# Supplementary material for: Role of Calcium-Activated Potassium Channels in Proliferation, Migration and Invasion of Human Chronic Myeloid Leukemia K562 Cells
Source: MDPI journal article supplement (doi:10.3390/membranes13060583), 2023-06-04
Supplement: s1 [file s1]

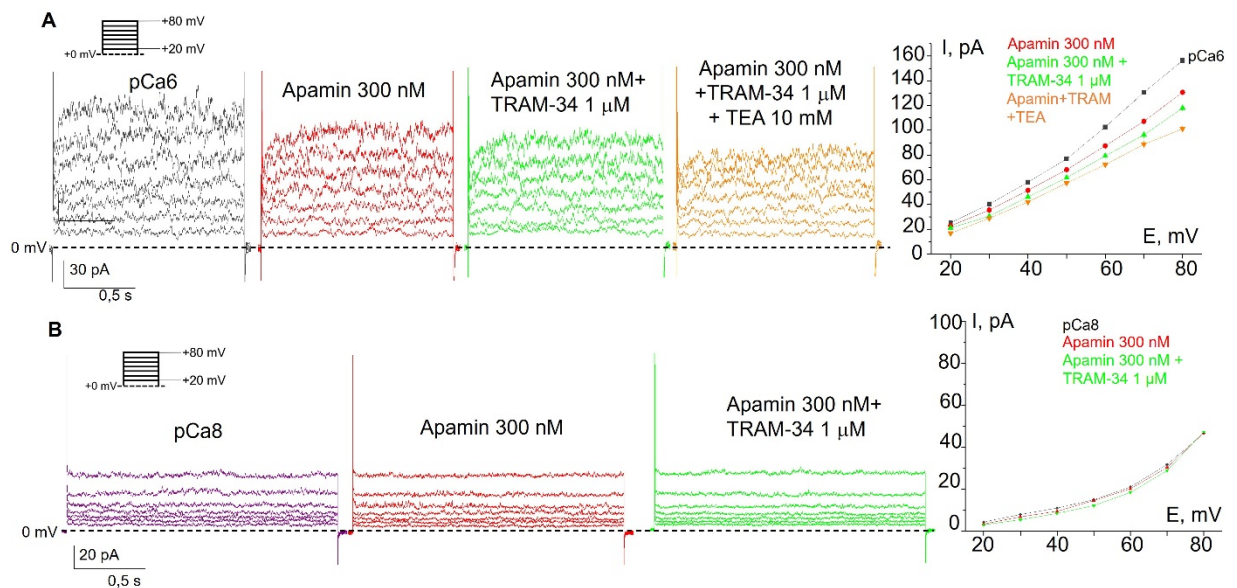

**Supplementary Figure S1. The action of TEA and pCa8 on whole-cell currents in K562 cells.** Shown are representative experiments demonstrating (A) the effect of 10 mM TEA, a non-specific K channel blocker, on whole-cell currents in the plasma membrane of K562 cells. Note a further decrease of outward currents after the application of TEA. (B). Whole-cell currents in the presence of low  $\text{Ca}^{2+}$  concentration in recording pipette (mM): 140 KAspartate, 5 NaCl, 2 EGTA/KOH, 1  $\text{MgCl}_2$ , 20 HEPES/TrisOH with necessary amount of  $\text{CaCl}_2$  to establish free ionized calcium concentration  $[\text{Ca}^{2+}]_i$  at 10 nM (pCa8). No significant effects of apamin and TRAM-34 on whole-cell currents are observed. Also note the smaller amplitudes of currents in pCa8, comparing to pCa6 (panel A and Figure 1).

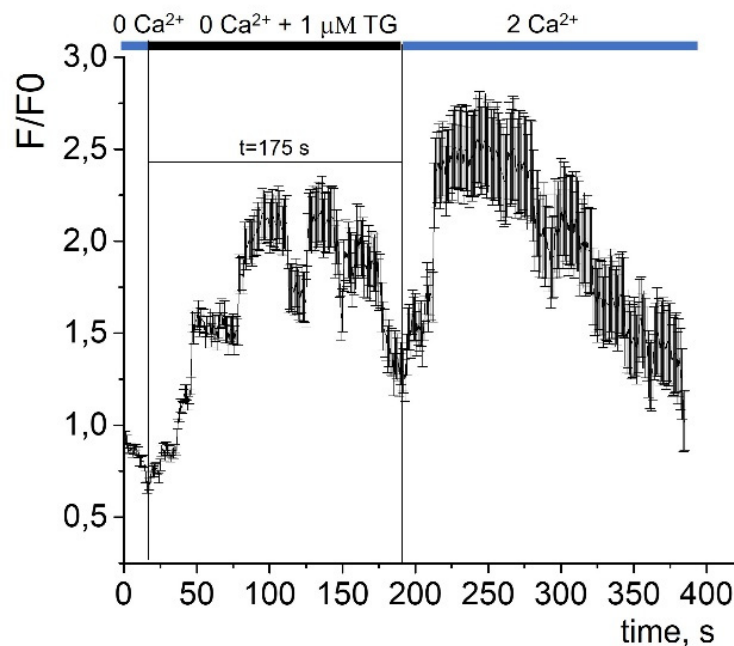

**Supplementary Figure S3. Dynamics of TG-induced  $\text{Ca}^{2+}$  store depletion in K562 cells.**  $\text{Ca}^{2+}$  responses of K562 cells to the application of 1  $\mu\text{M}$  of thapsigargin (TG) in  $\text{Ca}^{2+}$ -free solution (0  $\text{Ca}^{2+}$ ). The addition of 2 mM  $\text{Ca}^{2+}$  further increase further increase Fluo8 fluorescence and, accordingly,  $\text{Ca}^{2+}$  levels in the cells.

Shown are mean fluorescence (F) intensities ( $\pm$  SEM) at each timepoint normalized to the intensity ( $F_0$ ) at the beginning of the experiment (in 0  $\text{Ca}^{2+}$  solution, n=28 cells used for the analysis). Note that TG-induced  $\text{Ca}^{2+}$  response lasts about 3 minutes (175 s).
